# Supplementary material for: Probing the PI3K/Akt/mTor pathway using 31P-NMR spectroscopy: routes to glycogen synthase kinase 3
Source: PubMed Central journal article supplement (PMC5109916; doi:10.1038/srep36544), 2016-11-04
Supplement: srep36544-s1.pdf [file srep36544-s1.pdf]

## Probing the PI3K/Akt/mTor pathway using <sup>31</sup>P-NMR spectroscopy: routes to glycogen synthase kinase 3

Su M Phyu, Chih-Chung Tseng, Ian N Fleming, Tim AD Smith\*

### Supplementary Data File

Supplementary Fig 1: GSK and pGSK western blots showing entire blot

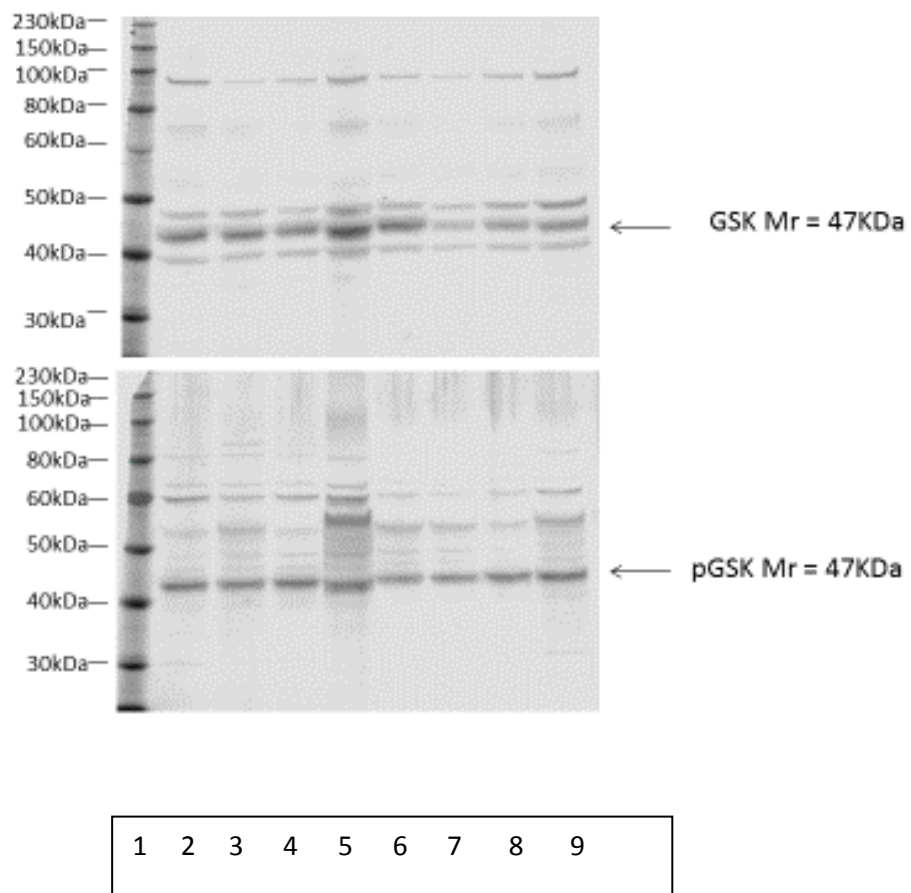

Molecular weight markers (lane 1) lysates of control cells (lane 2), cells treated with LY294002-50uM (lane 3), MK2206-10uM (lane 4), Rapamycin-20nM (lane 5), AZD8055-500nM (lane 6), LY+SB 216367 (lane 7), AZD+SB 216763 (lane 8) and SB 216763 (lane 9).

Supplementary Fig 2 – AKT and pAKT western blots showing entire blot

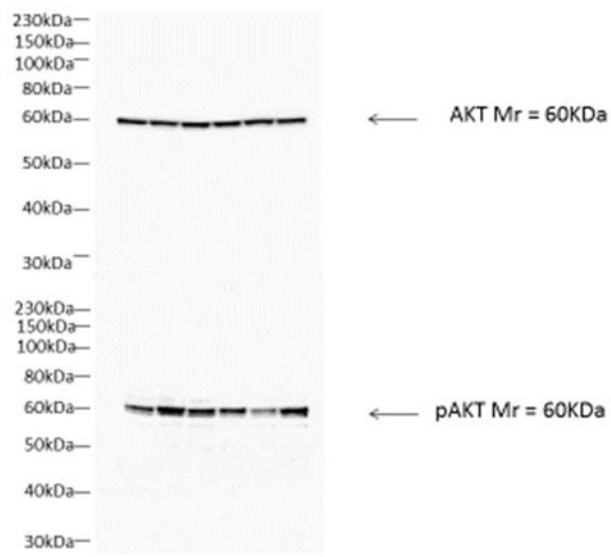

Supplementary Fig S3:  $^{31}\text{P}$ -NMR spectra of AZD8055 treated cells extract before (Red) and after (blue) addition of commercially available UDP-glucose. Whole spectra (A) and Expanded (B).

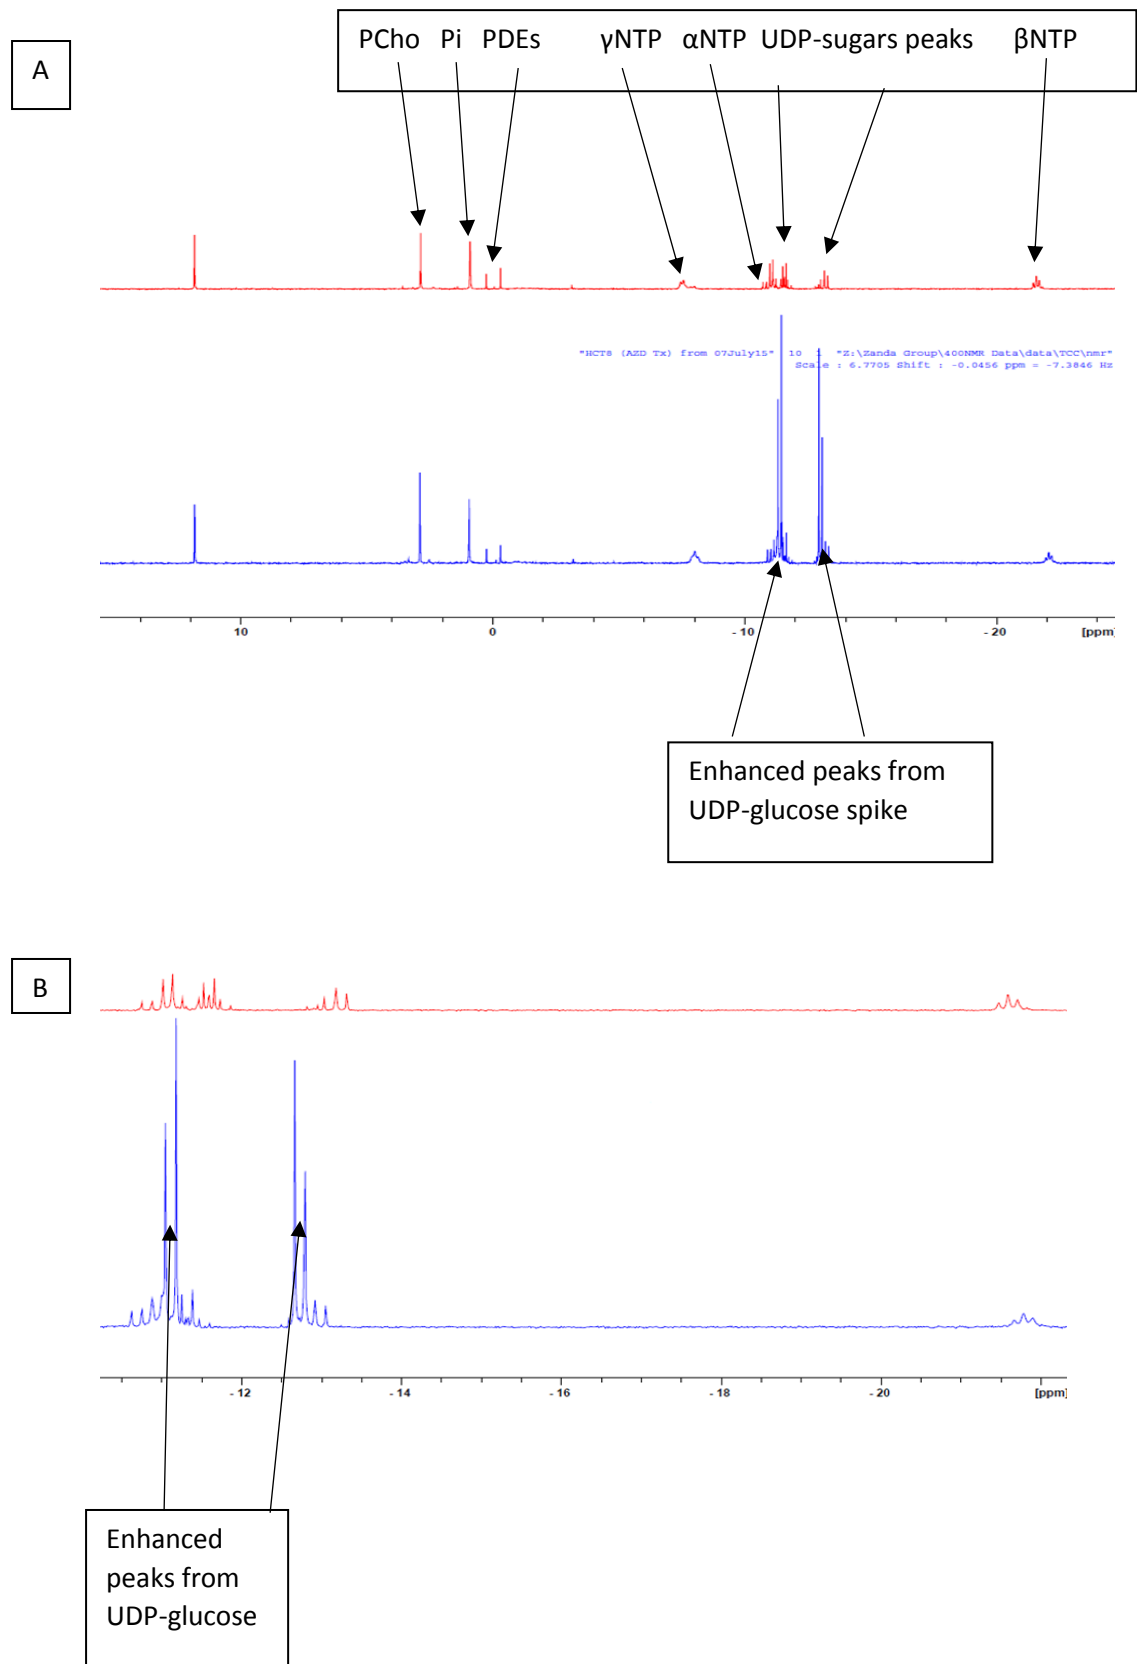

Supplementary Fig S4:  $^{31}\text{P}$ -NMR spectra of LY294002 treated cells extract before (blue) and after (red) addition of commercially available UDP-N-acetylglucosamine. Whole spectra (A) and expanded (B).

A

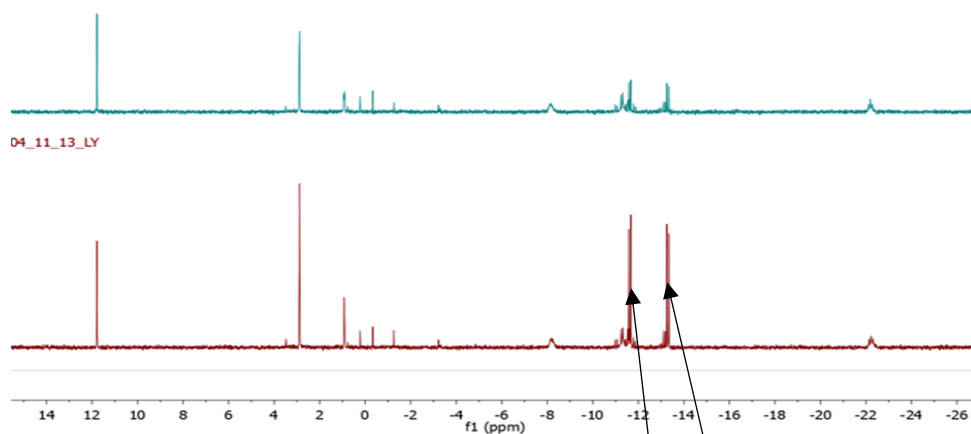

Enhanced peaks from UDP-N-acetylglucosamine spiek

B

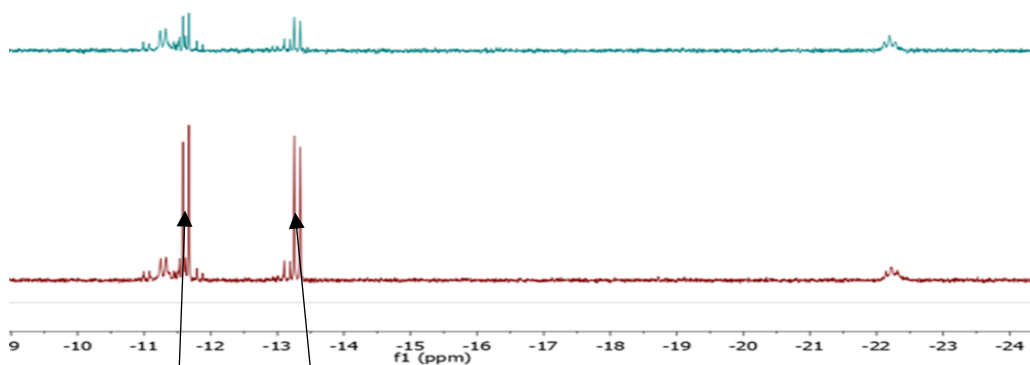

Enhanced peaks from UDP-N-acetylglucosamine

Supplementary Fig S5: Representative spectra of extracts from control (A) and SB216763 (33 $\mu$ M) treated (B) MDA-MB-468 cells

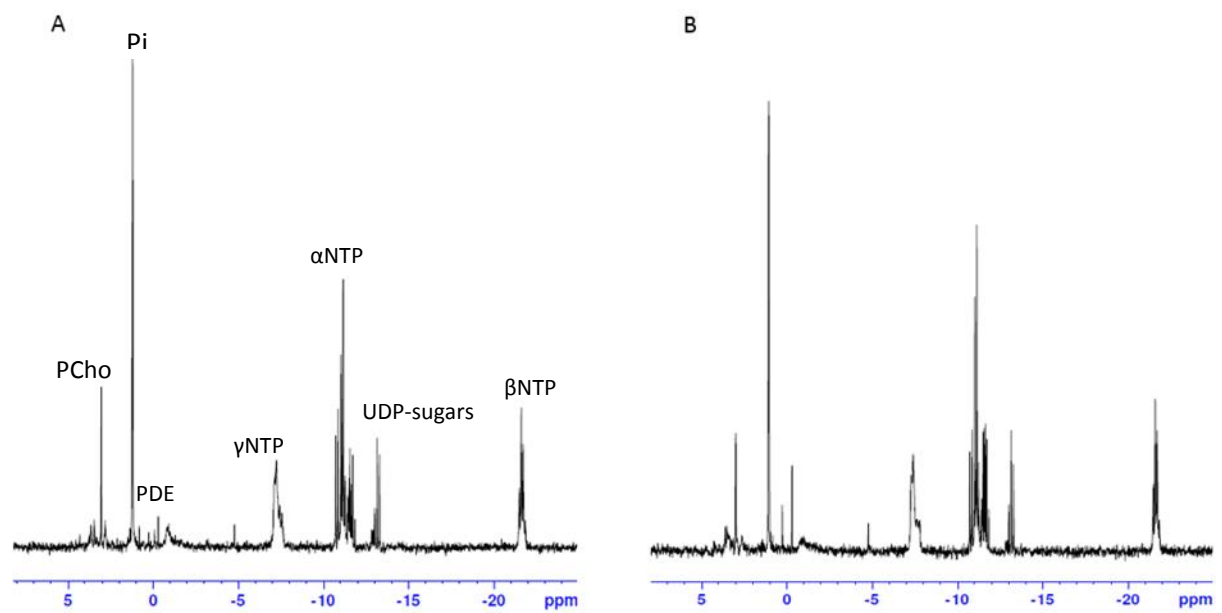

Supplementary Fig S6) Representative spectra of extracts from control (A) and staurosporine treated (B) MDA-MB-468 cells

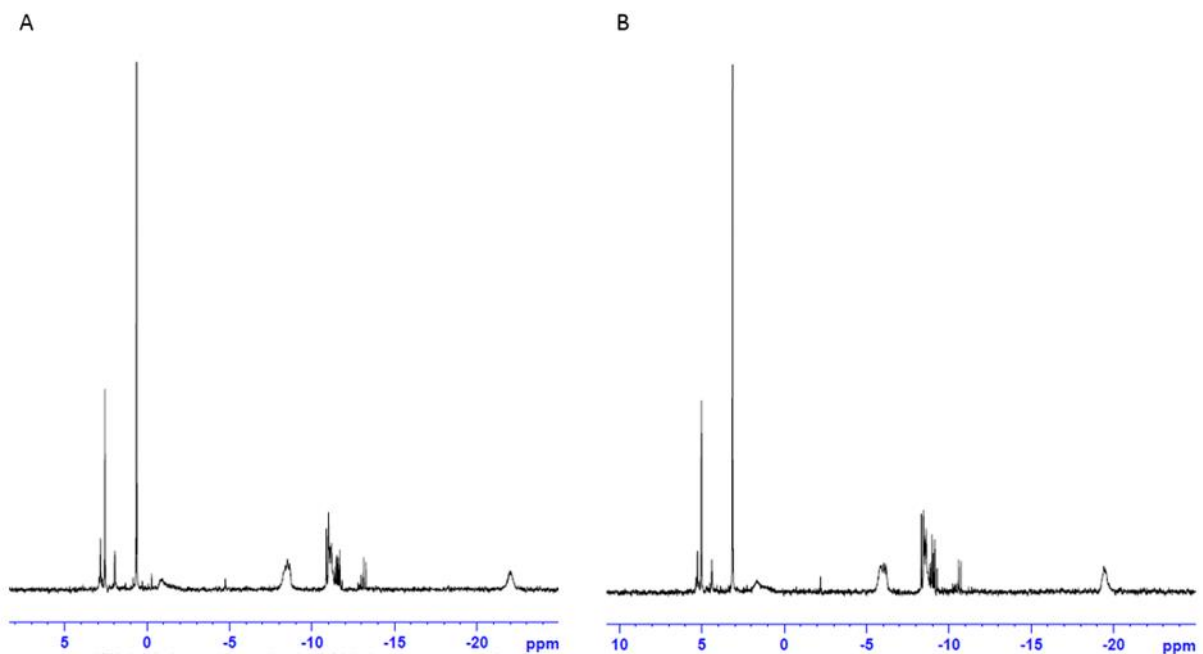

Supplementary Fig S7: Representative spectra of extracts from control (A) and GSK2334470 (B) treated MDA-MB-468 cells

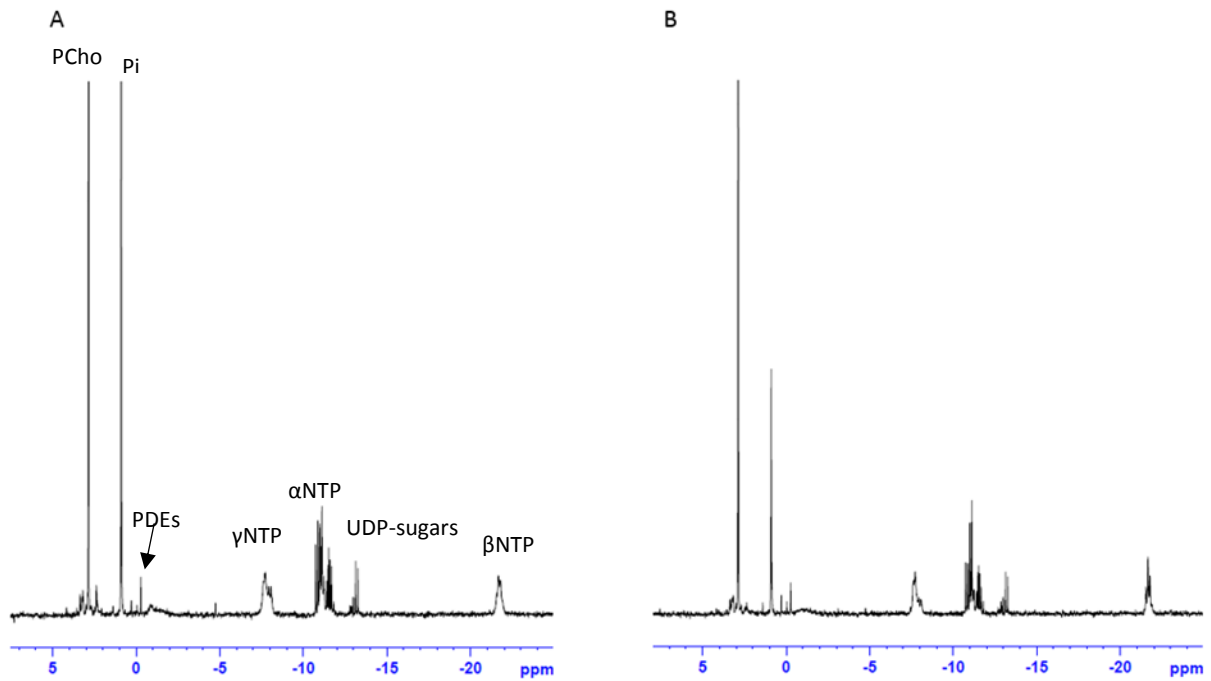

Supplementary Fig S8: Representative spectra of extracts from control (A) and H-89 treated (B) MDA-MB-468 cells

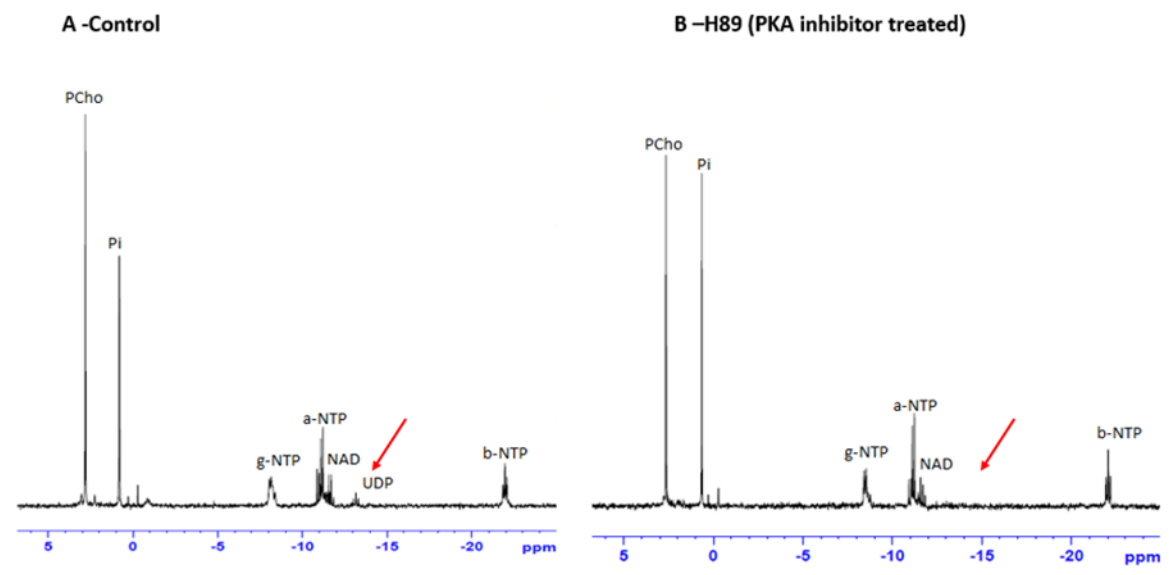

Supplementary Fig S9) Representative western blot of total and phosphor-GSK in untreated (con) and H89-treated (24h) MDA-MB-468 cells

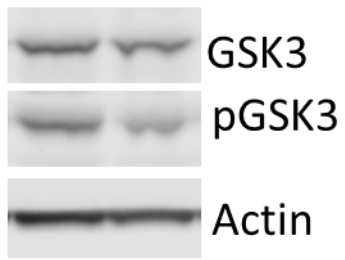

Con H89
